# Supplementary material for: Auricular Acupressure Combined with Self-Help Intervention for Treating Chronic Tinnitus: A Longitudinal Observational Study
Source: MDPI journal article supplement (doi:10.3390/jcm10184201), 2021-09-16
Supplement: s1 [file s1]

**S1. Supplemental Material. Visualization of the individual data in the study group over the six-week period.** Tinnitus loudness and tinnitus distress as the main outcome variables are drawn in thick lines.

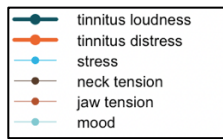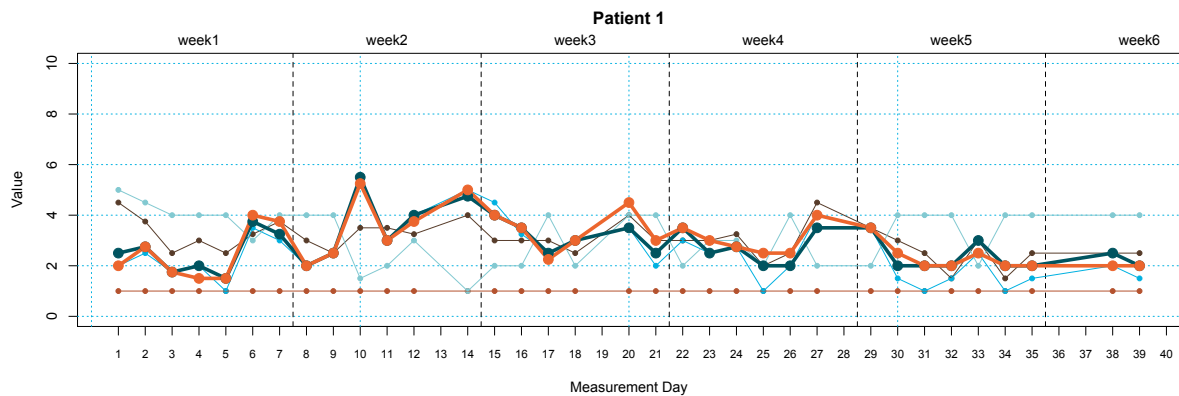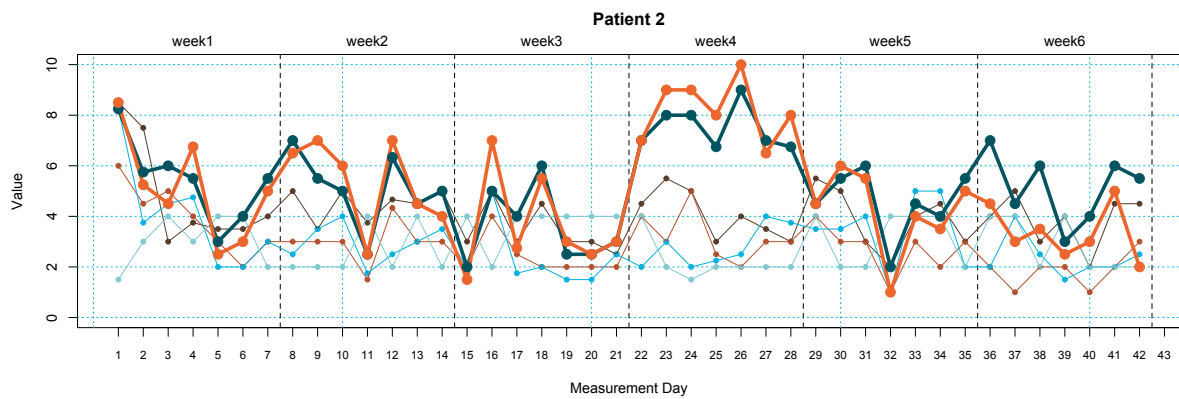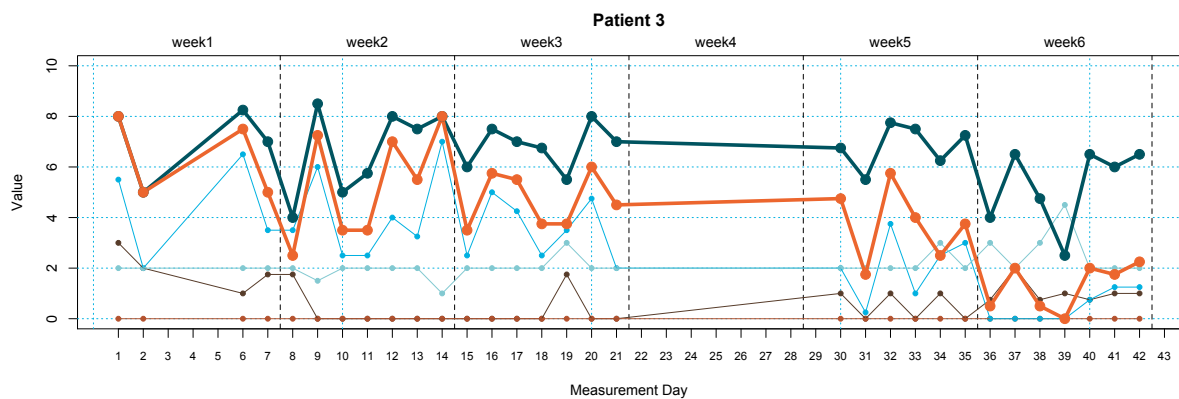

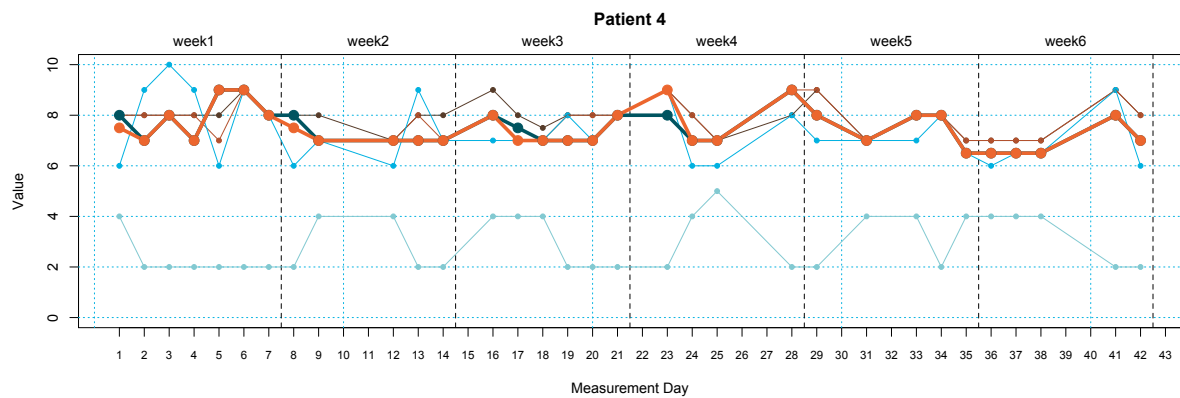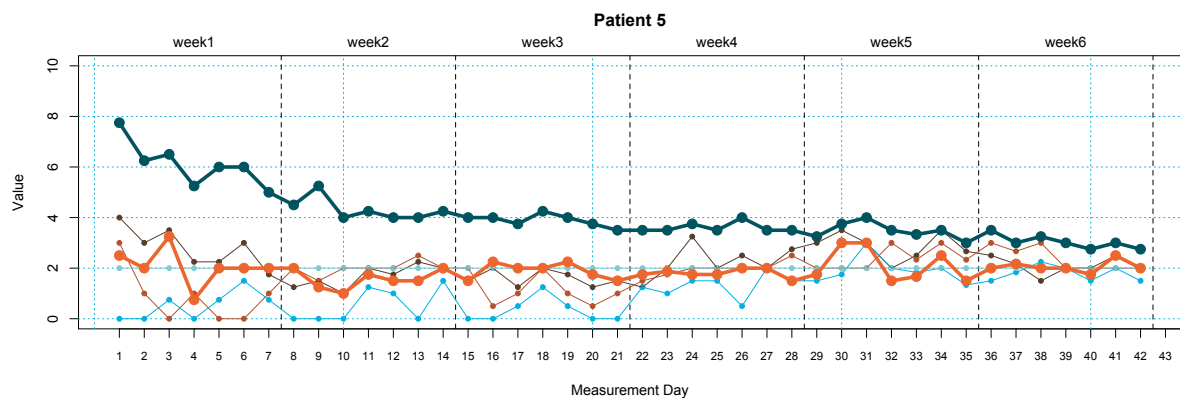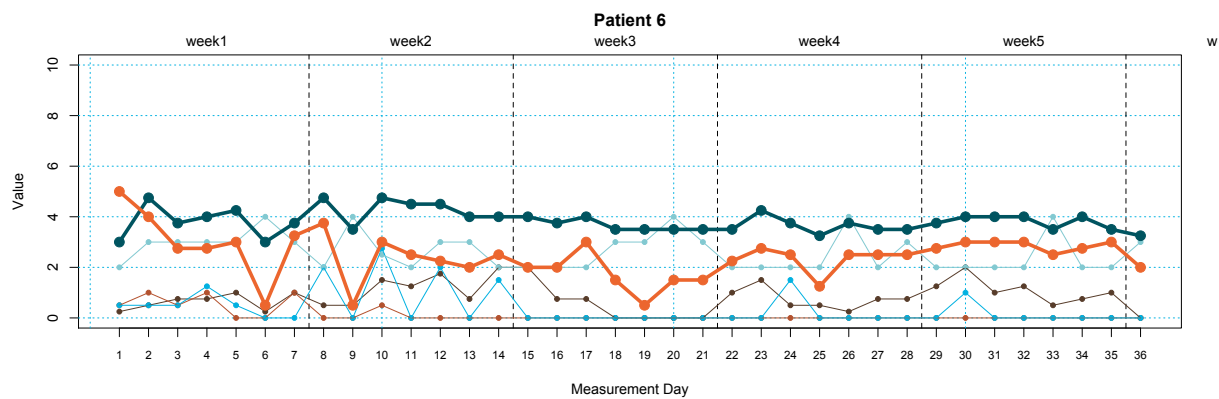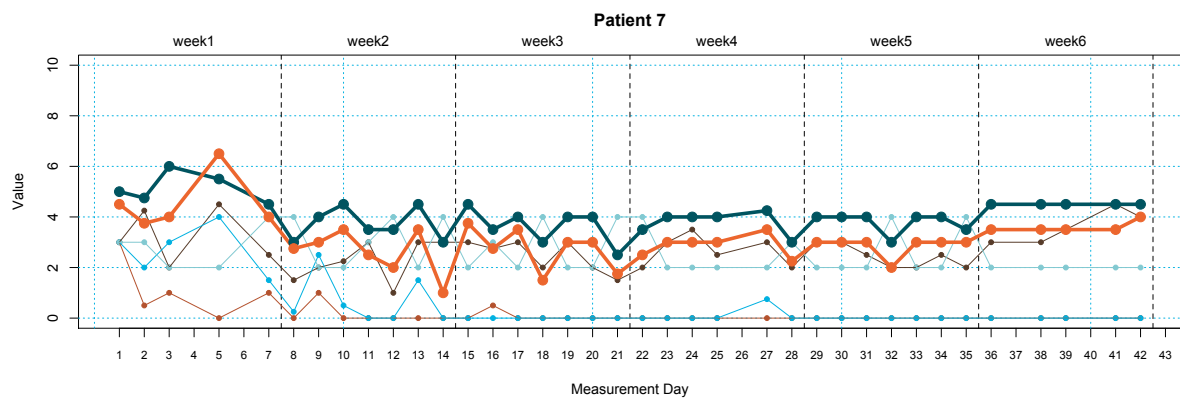

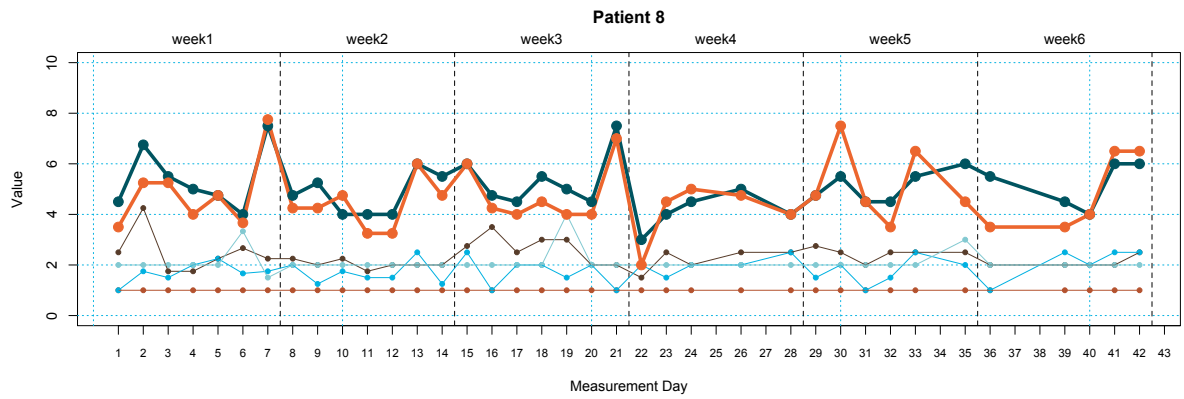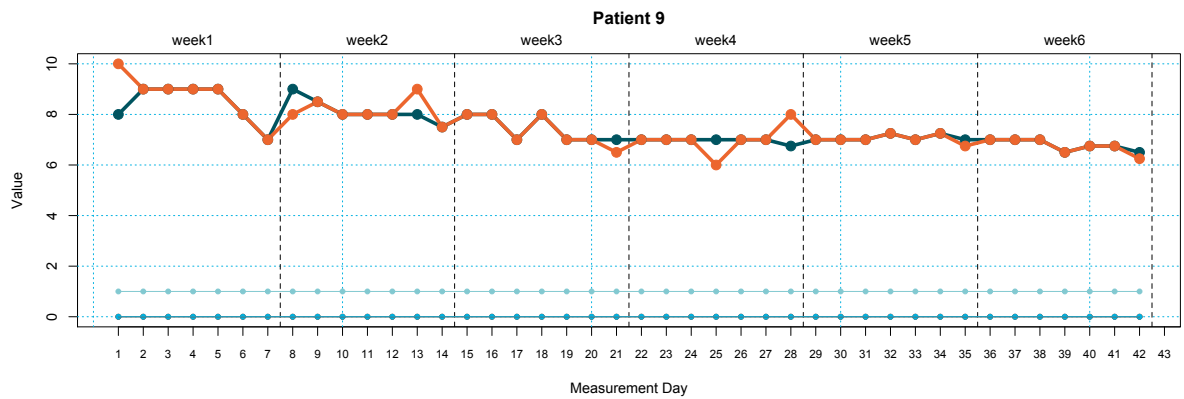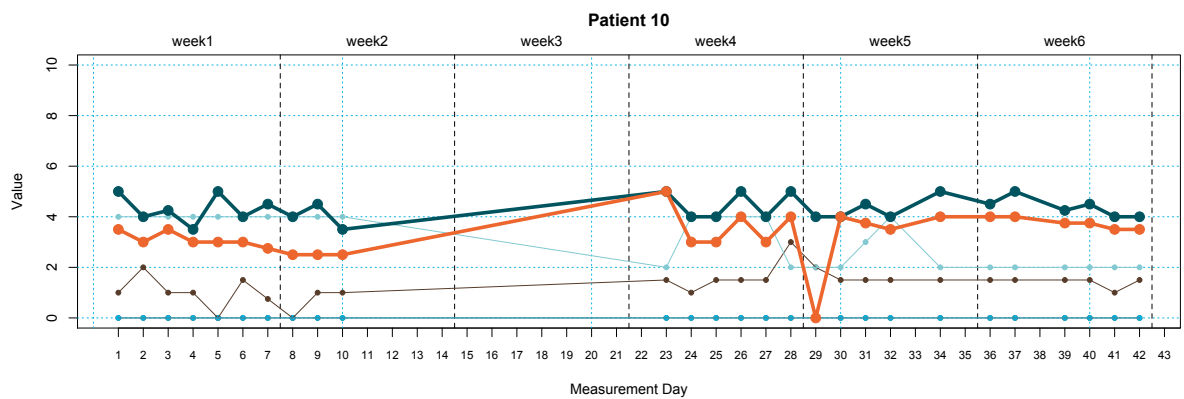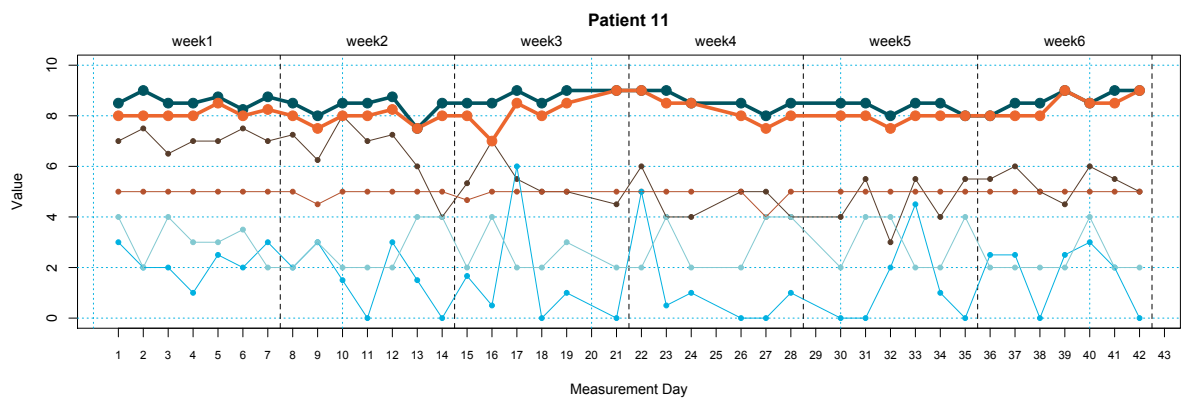

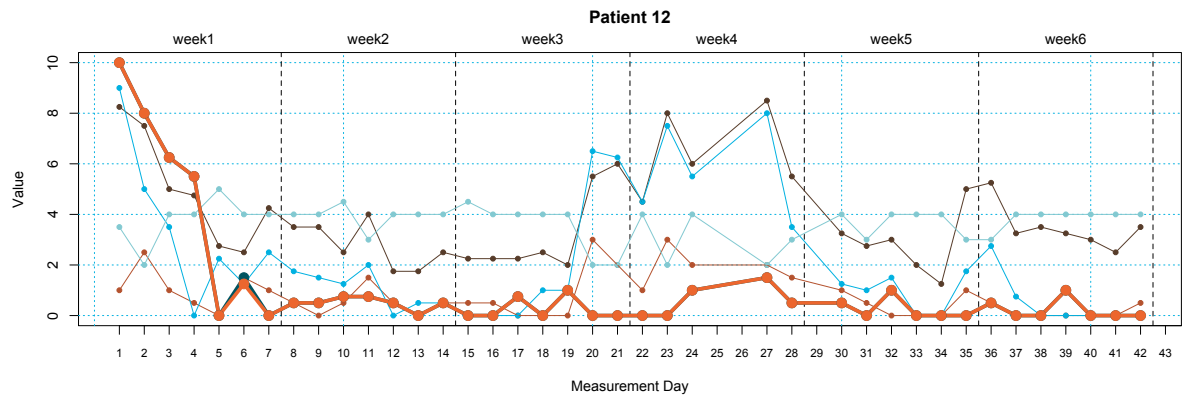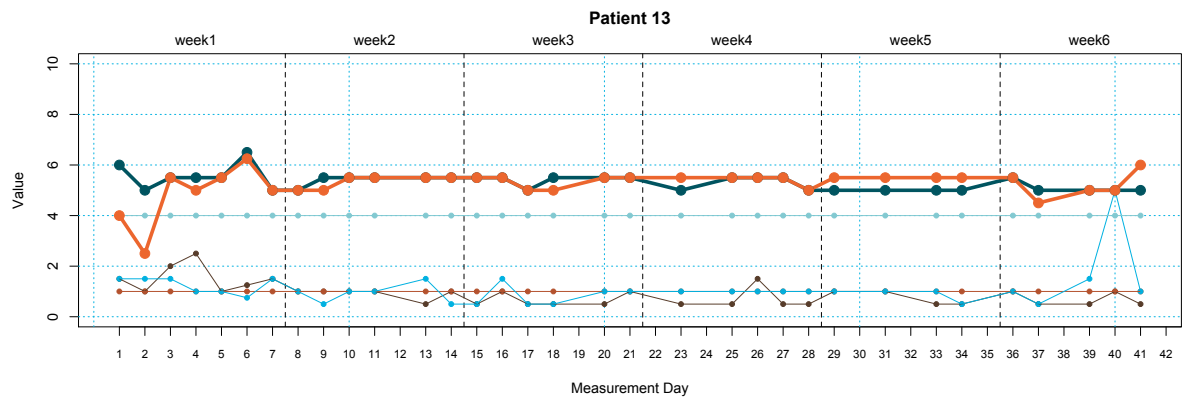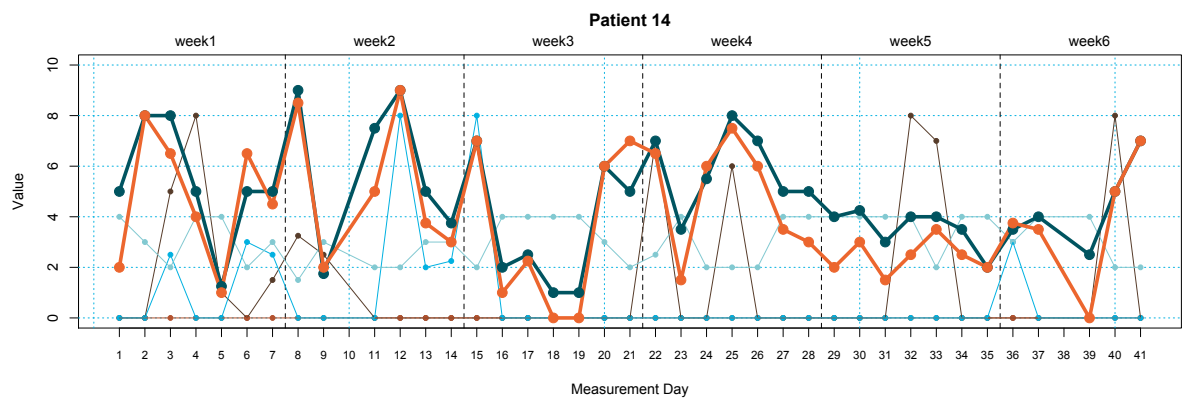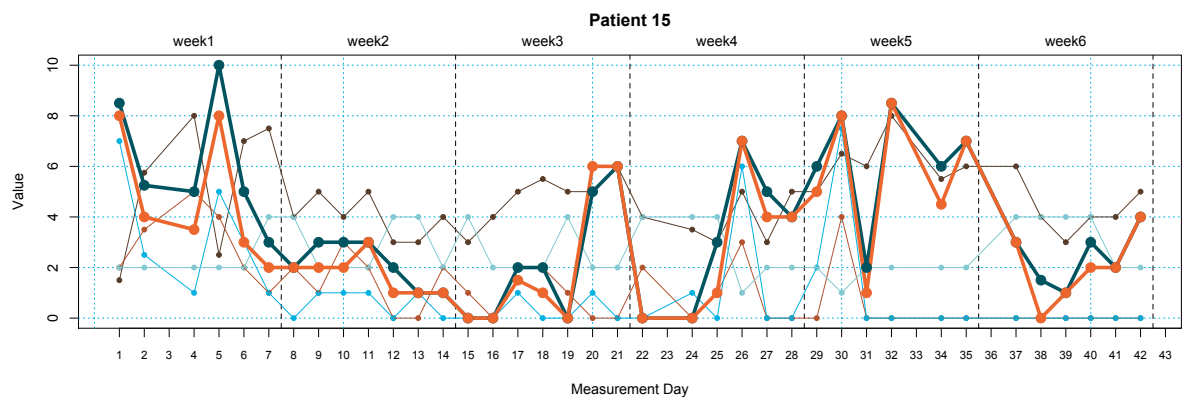



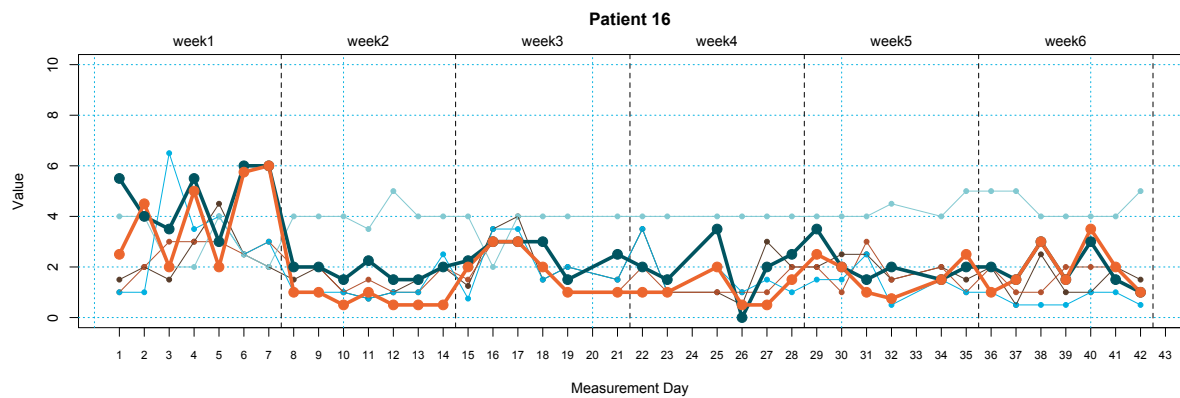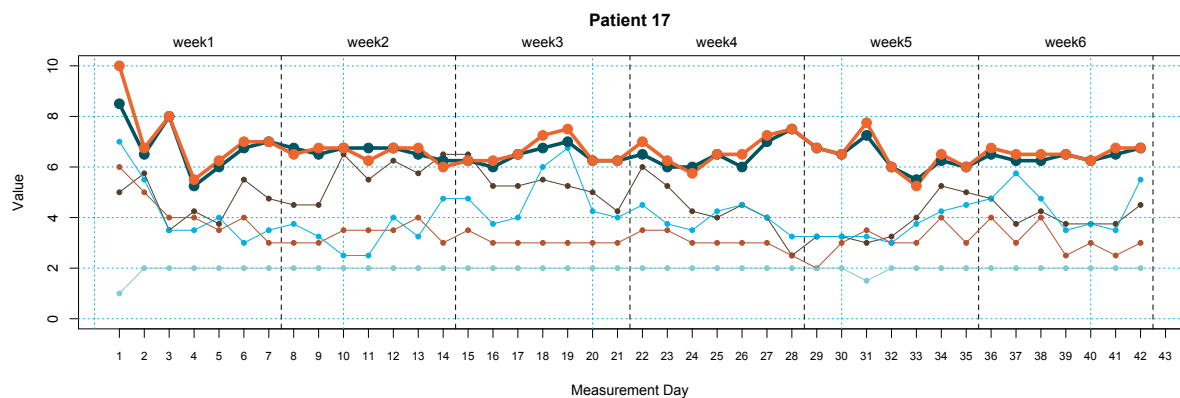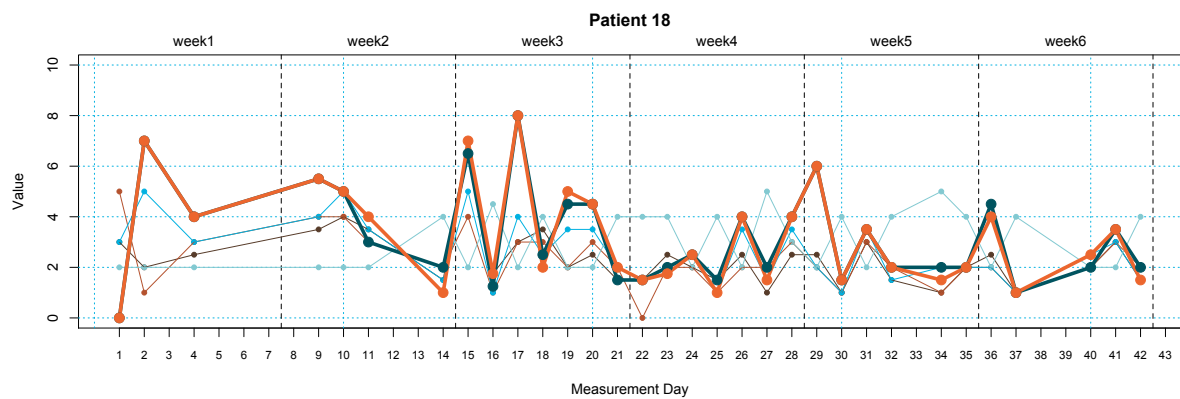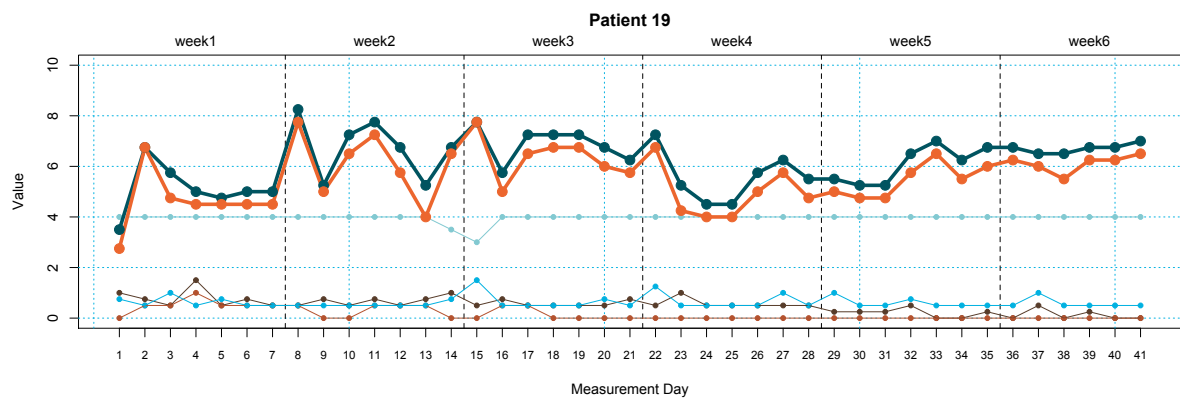

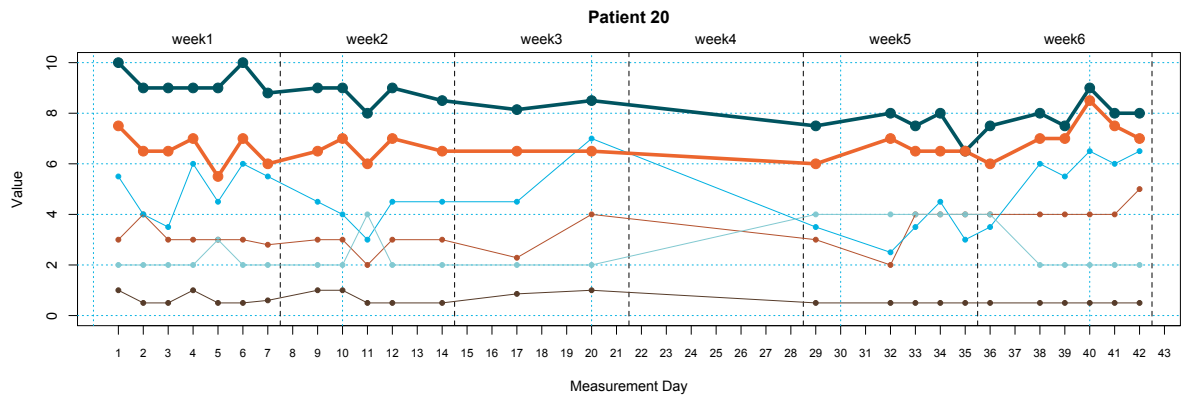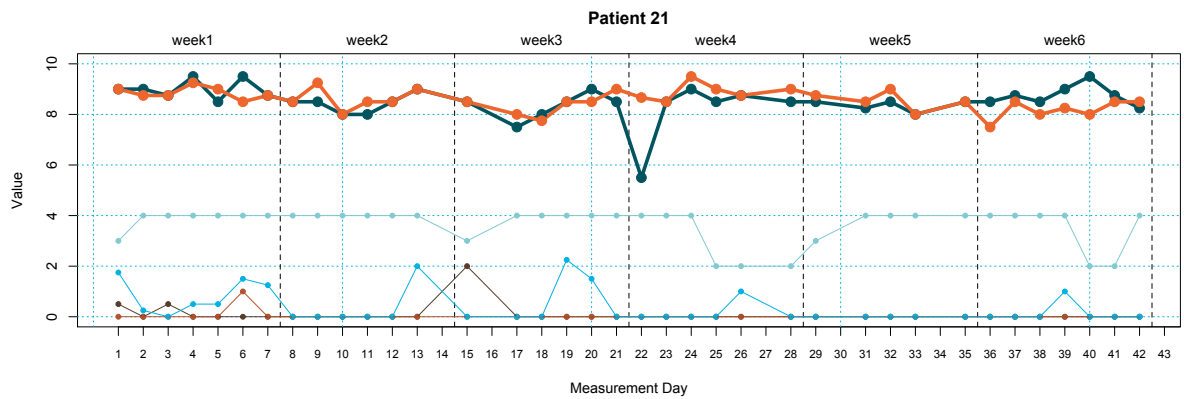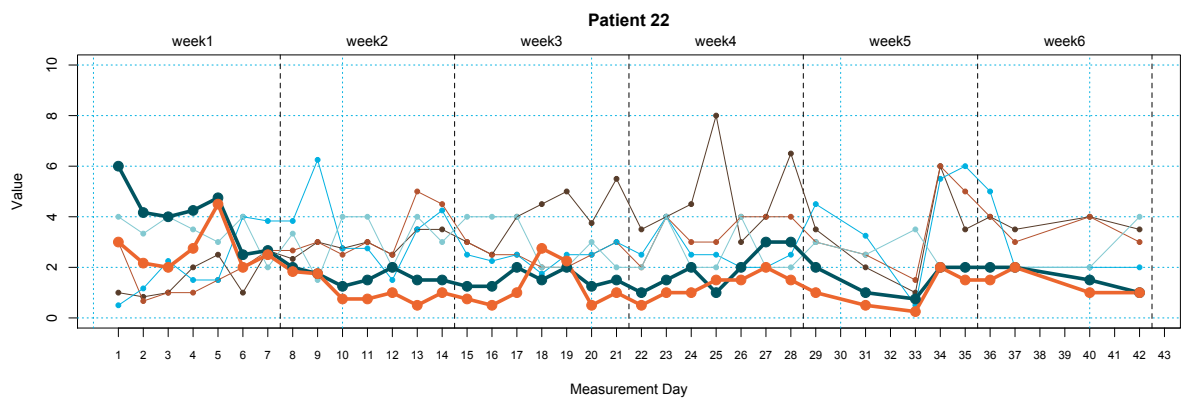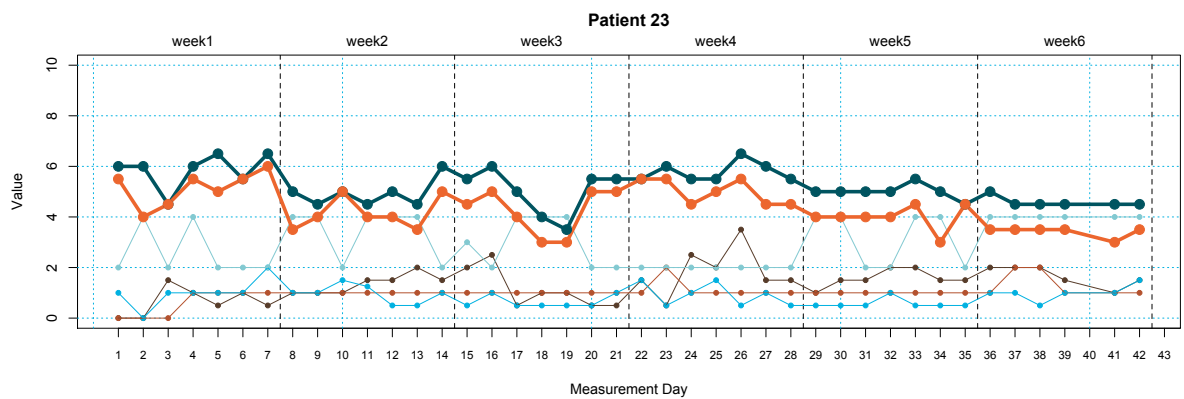

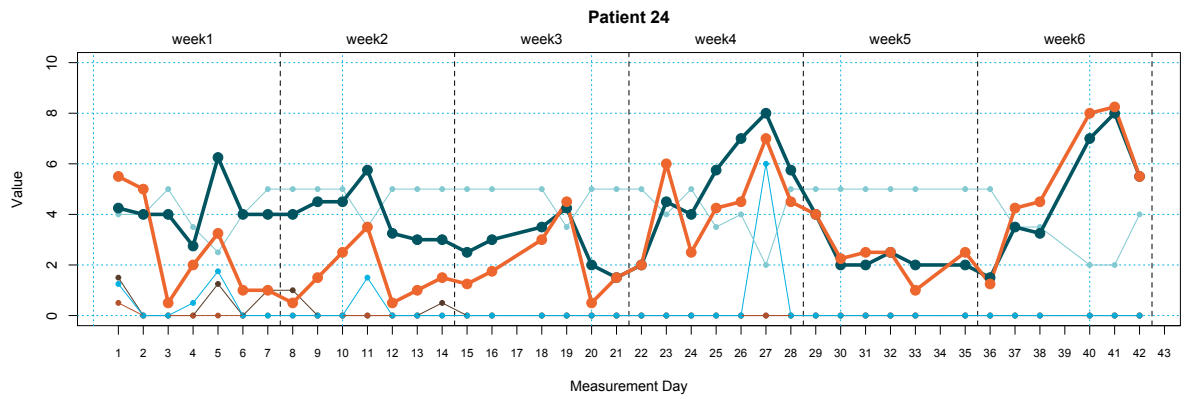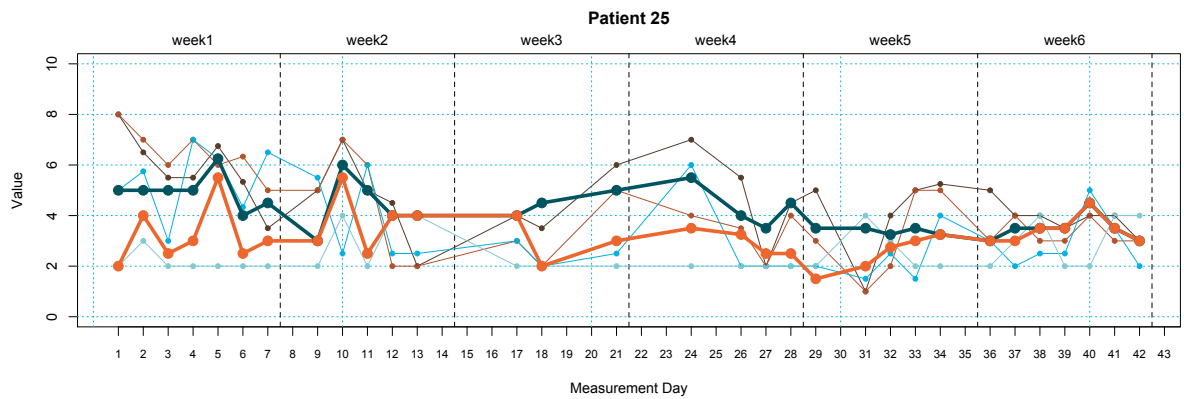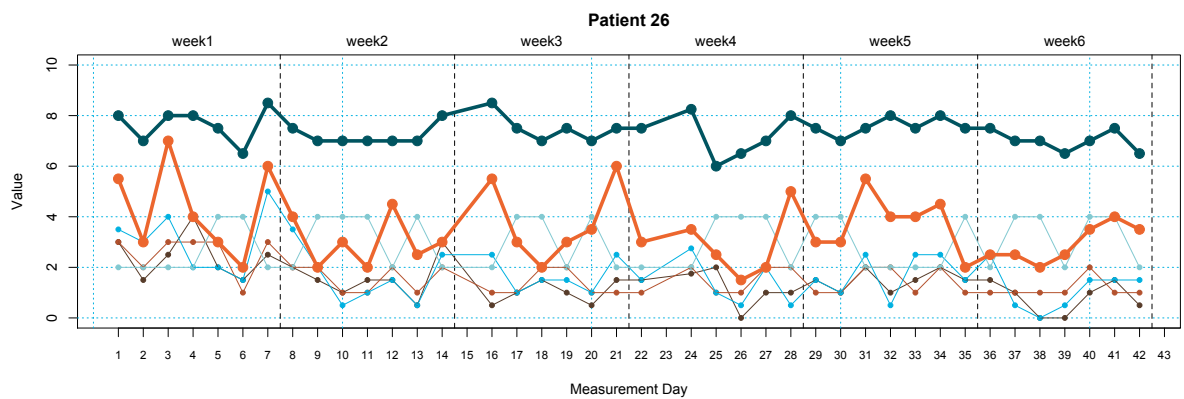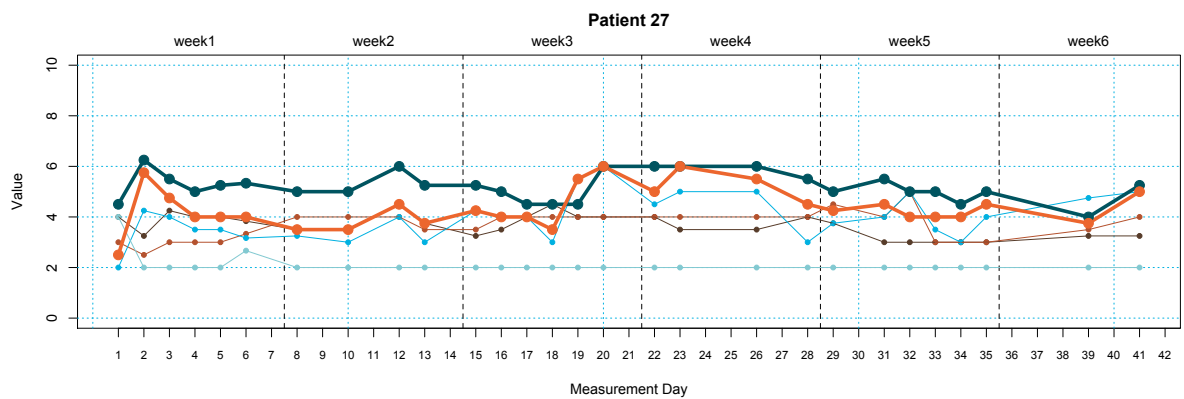

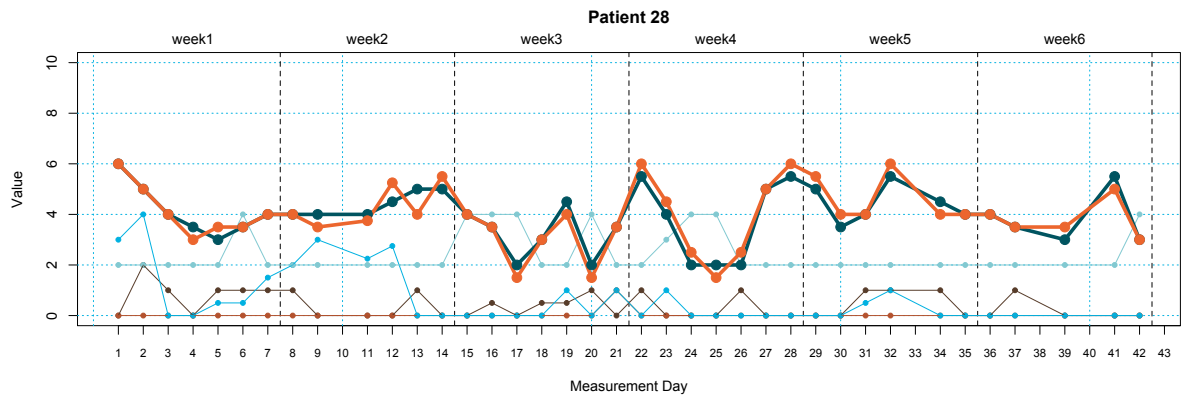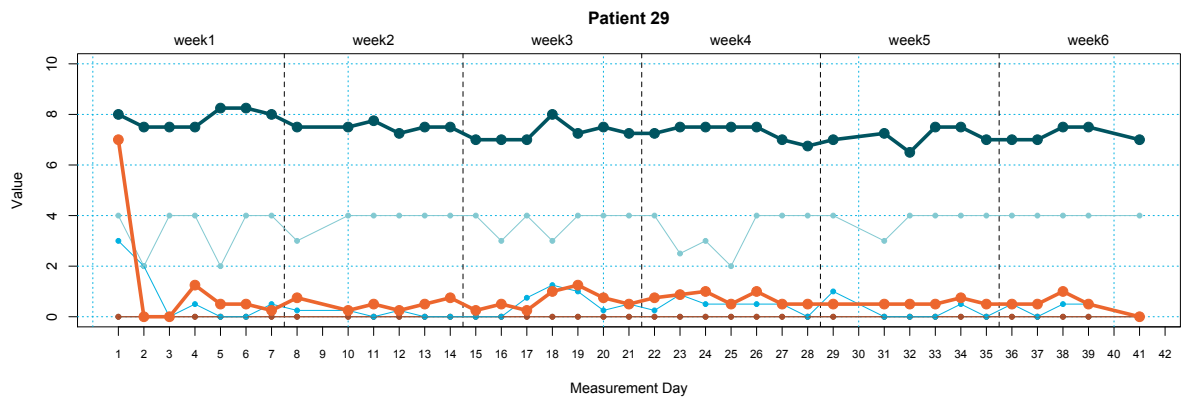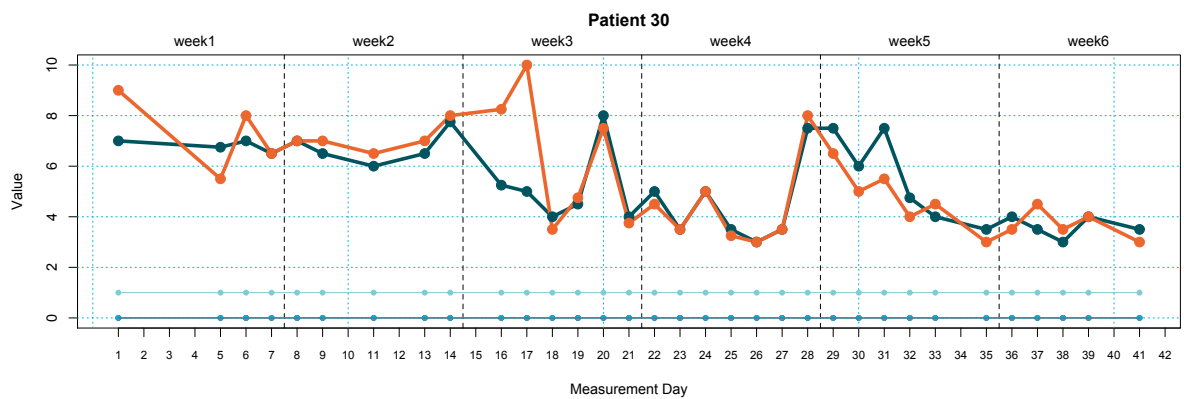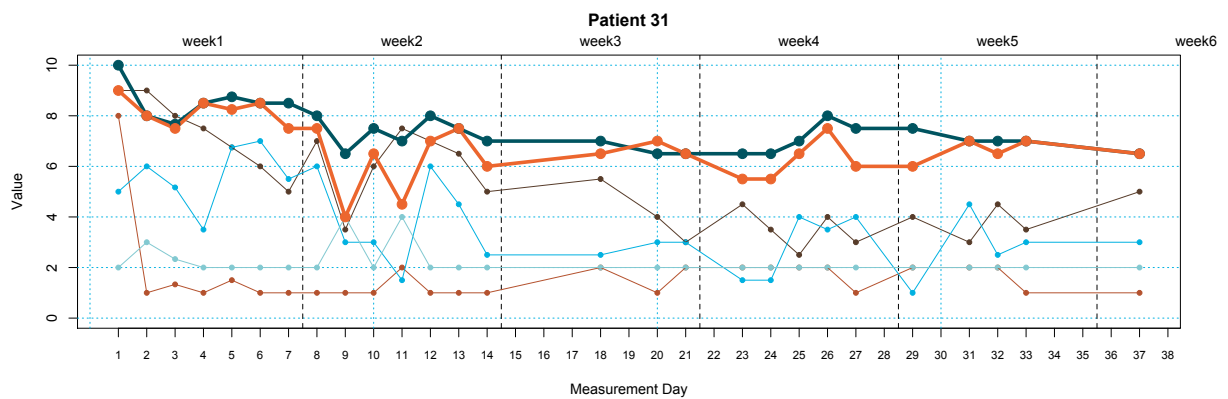

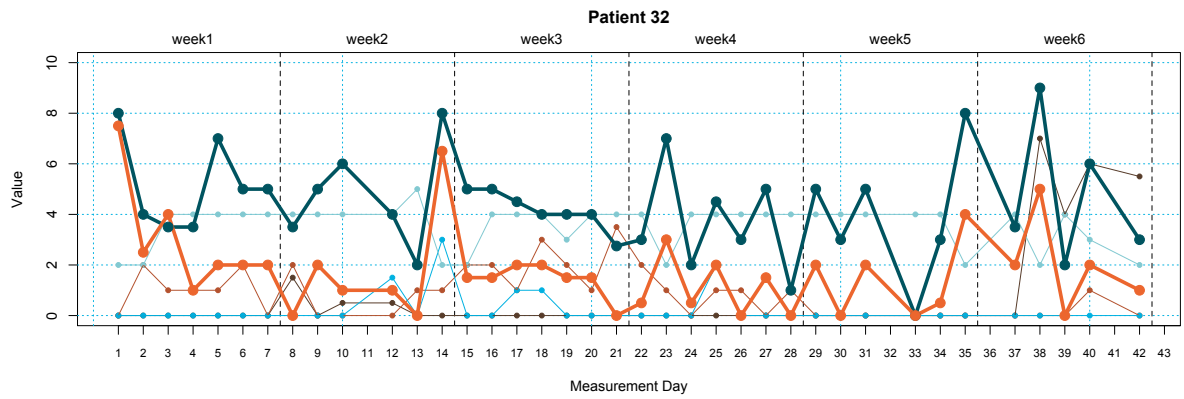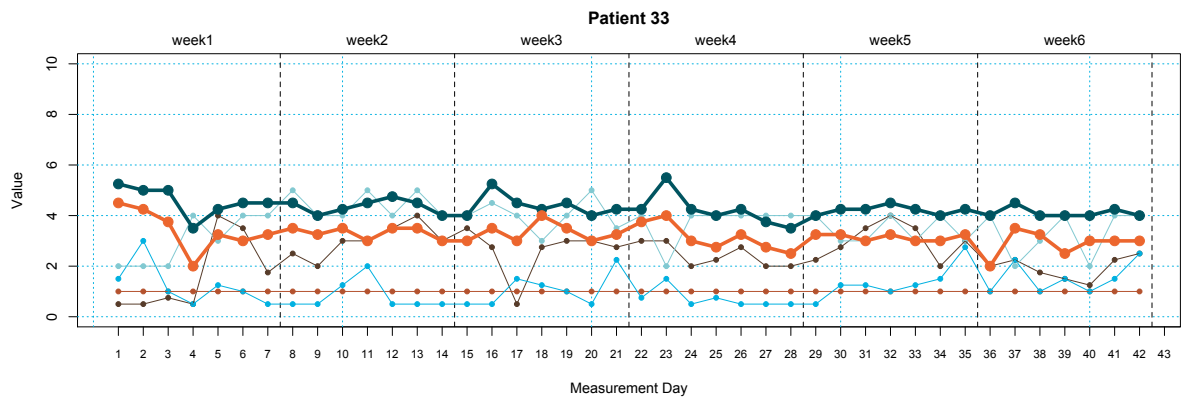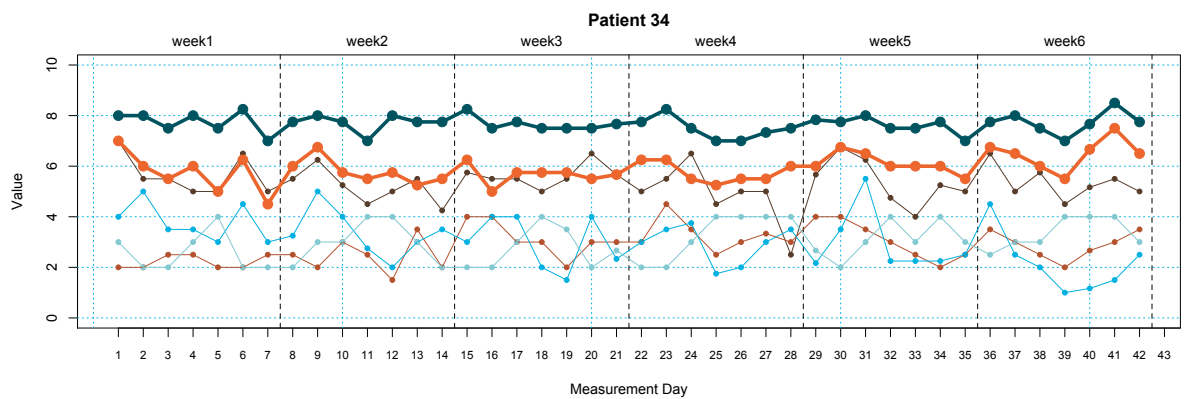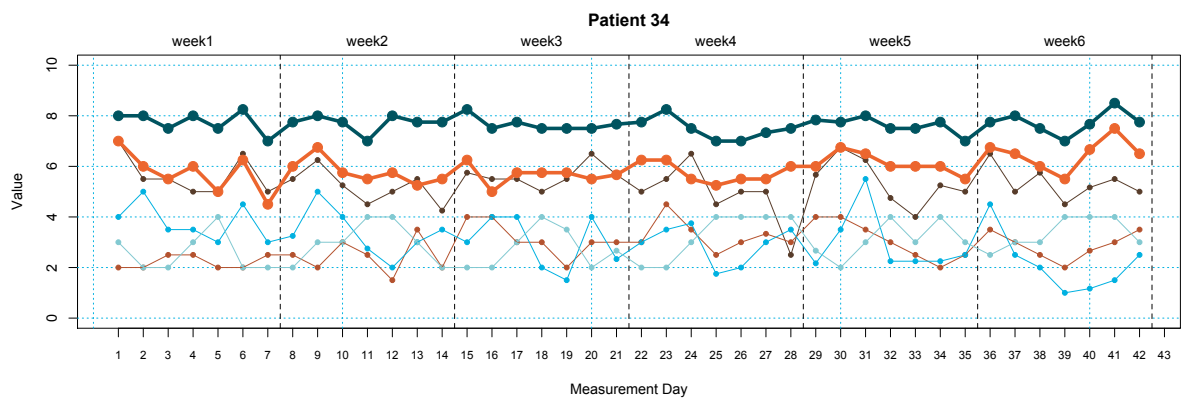

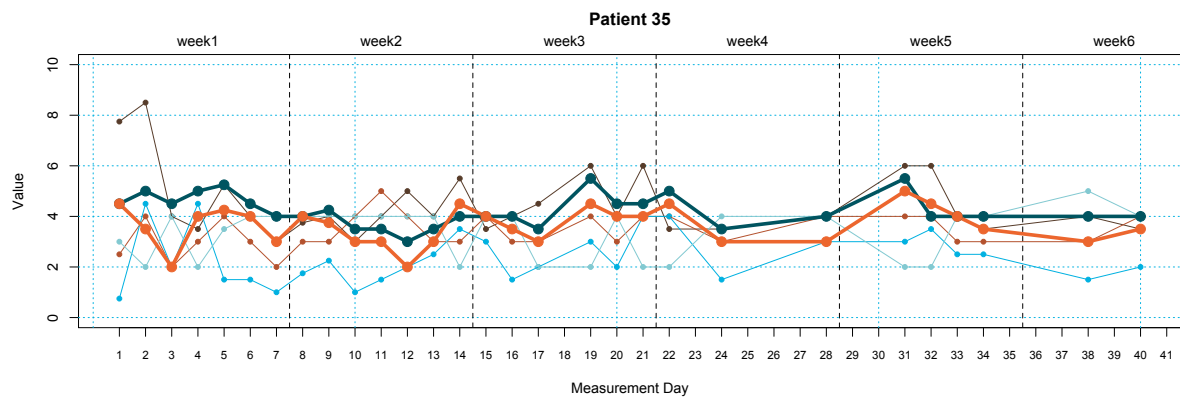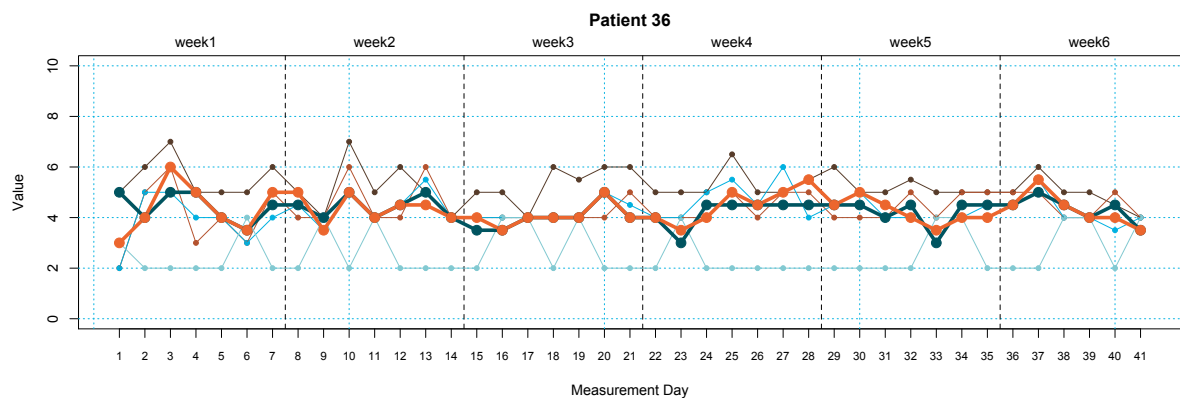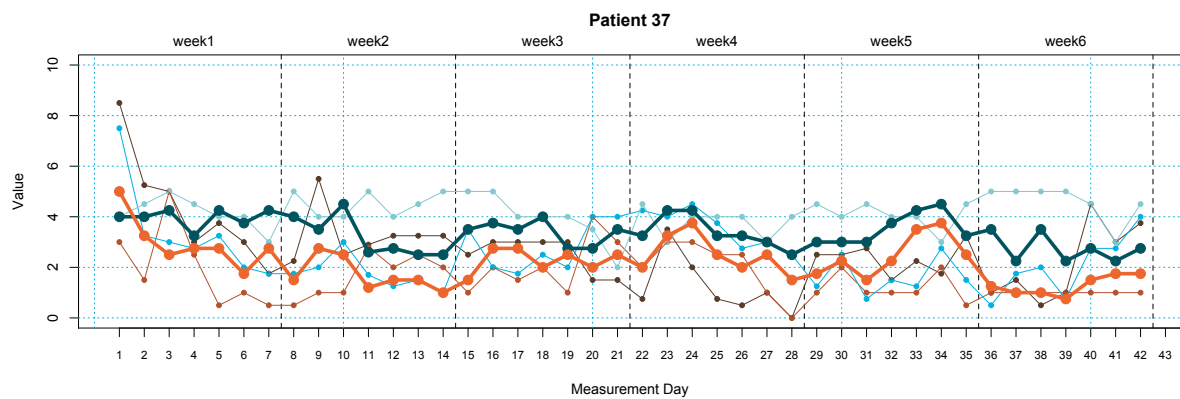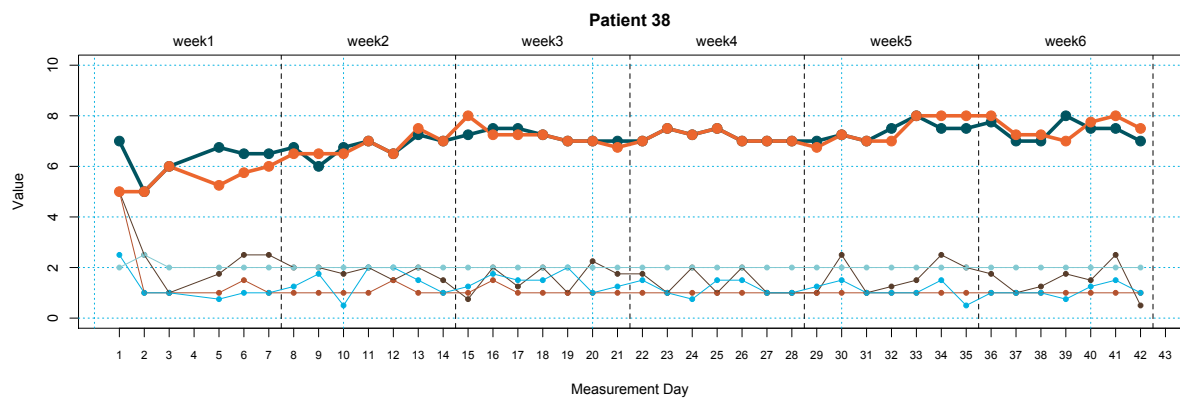

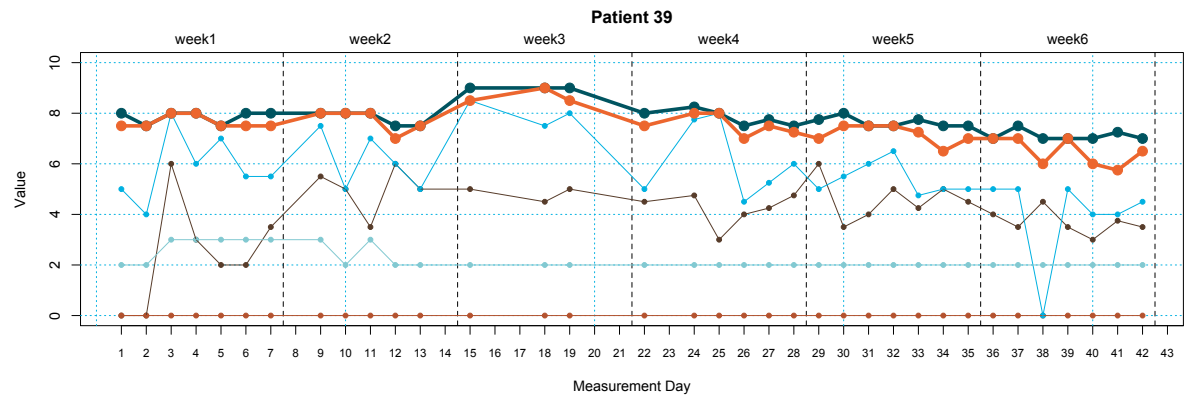

**S2. Supplemental Material. Overview of the linear regression estimated in the study group.** Estimates are summerized and mean  $\pm$  standard deviation are provided in the table together with the range of estimates [min; max] .

| Symptom                     | Intercept                        | Slope                              |
|-----------------------------|----------------------------------|------------------------------------|
| Tinnitus Loudness           | 5.72 $\pm$ 1.79<br>[3.16; 9.13]  | -.023 $\pm$ .027<br>[-.098; .030]  |
| Tinnitus Distress           | 4.70 $\pm$ 2.13<br>[.97; 8.84]   | -.018 $\pm$ .036<br>[-.118; .060]  |
| Stress                      | 2.65 $\pm$ 1.89<br>[ .07; 7.84]  | -.022 $\pm$ .033<br>[-.107; .045]  |
| Tension in the jaw muscles  | 2.17 $\pm$ 1.82<br>[.022; 7.81]  | -.008 $\pm$ .029<br>[-.087; .051]  |
| Tension in the neck muscles | 3.00 $\pm$ 2.29<br>[-1.06; 8.16] | -.013 $\pm$ .037<br>[ -.144; .085] |
| Mood                        | 2.84 $\pm$ .85<br>[1.00; 4.44]   | .000 $\pm$ .016<br>[-.055; .035]   |
